# Supplementary material for: Electron Bernstein waves driven by electron crescents near the electron diffusion region
Source: PubMed Central journal article supplement (PMC6952373; doi:10.1038/s41467-019-13920-w), 2020-01-09
Supplement: 41467_2019_13920_MOESM2_ESM.pdf [file 41467_2019_13920_MOESM2_ESM.pdf]

# 1 **Electron Bernstein Waves driven by Electron Crescents** 2 **near the Electron Diffusion Region**

3 W. Y. Li<sup>1,2,3</sup>, D. B. Graham<sup>2</sup>, Yu. V. Khotyaintsev<sup>2</sup>, A. Vaivads<sup>4</sup>, M. André<sup>2</sup>, K. Min<sup>5</sup>, K. Liu<sup>6</sup>,  
4 B. B. Tang<sup>1</sup>, C. Wang<sup>1</sup>, K. Fujimoto<sup>7</sup>, C. Norgren<sup>8</sup>, S. Toledo-Redondo<sup>9,10</sup>, P.-A. Lindqvist<sup>4</sup>, R. E.  
5 Ergun<sup>11</sup>, R. B. Torbert<sup>12</sup>, A. C. Rager<sup>13,14</sup>, J. C. Dorelli<sup>14</sup>, D. J. Gershman<sup>14,15</sup>, B. L. Giles<sup>14</sup>, B.  
6 Lavraud<sup>9</sup>, F. Plaschke<sup>16</sup>, W. Magnes<sup>16</sup>, O. Le Contel<sup>17</sup>, C. T. Russell<sup>18</sup>, & J. L. Burch<sup>19</sup>

7 <sup>1</sup>*State Key Laboratory of Space Weather, National Space Science Center, Chinese Academy of*  
8 *Sciences, Beijing 100190, China*

9 <sup>2</sup>*Swedish Institute of Space Physics, Uppsala SE-75121, Sweden*

10 <sup>3</sup>*State Key Laboratory of Lunar and Planetary Sciences, Macau University of Science and Tech-*  
11 *nology, Macau, China*

12 <sup>4</sup>*Division of Space and Plasma Physics, School of Electrical Engineering and Computer Science,*  
13 *KTH Royal Institute of Technology, Stockholm SE-11428, Sweden*

14 <sup>5</sup>*Department of Astronomy and Space Science, Chungnam National University, Daejeon 34134,*  
15 *Republic of Korea*

16 <sup>6</sup>*Department of Earth and Space Sciences, Southern University of Science and Technology, Shen-*  
17 *zhen 518055, China*

18 <sup>7</sup>*School of Space and Environment, Beihang University, Beijing 100191, China*

19 <sup>8</sup>*Department of Physics and Technology, University of Bergen, Bergen N-5020, Norway*

20 <sup>9</sup>*Institut de Recherche en Astrophysique et Planétologie, Université de Toulouse, CNRS, UPS,*  
21 *CNES, Toulouse 31028, France*

22 <sup>10</sup>*Department of Electromagnetism and Electronics, University of Murcia, Murcia 30003, Spain*

23 <sup>11</sup>*Laboratory of Atmospheric and Space Physics, University of Colorado, Boulder, Colorado*  
24 *80303, USA*

25 <sup>12</sup>*Space Science Center, University of New Hampshire, Durham, New Hampshire 03824, USA*

26 <sup>13</sup>*Catholic University of America, Washington DC 20064, USA*

27 <sup>14</sup>*NASA Goddard Space Flight Center, Greenbelt, Maryland 20771, USA*

28 <sup>15</sup>*Department of Astronomy, University of Maryland, College Park, Maryland 20742, USA*

29 <sup>16</sup>*Space Research Institute, Austrian Academy of Sciences, Graz 8042, Austria*

30 <sup>17</sup>*Laboratoire de Physique des Plasmas, CNRS/Ecole Polytechnique/Sorbonne Université/Univ.*  
31 *Paris Sud/Observatoire de Paris, Paris 75252, France*

32 <sup>18</sup>*Department of Earth and Space Sciences, University of California, Los Angeles, California*  
33 *90095, USA*

34 <sup>19</sup>*Southwest Research Institute, San Antonio, Texas 78238, USA.*

### 35 **Supplementary data 1 legend**

36 **Parameters of the electron model distribution functions** Columns from left to right: Number  
37 density ( $N_r$ , in  $\text{cm}^{-3}$ ), parallel and perpendicular thermal speeds ( $\delta v_{\parallel}$  and  $\delta v_{\perp}$ , in  $\text{km s}^{-1}$ ), the  
38 parallel speed ( $v_{\parallel,r}$ , in  $\text{km s}^{-1}$ ), and the perpendicular ring speed ( $v_{\perp,r}$ , in  $\text{km s}^{-1}$ ).
